# Supplementary material for: Meeting Report: The Allied Genetics Conference 2016
Source: Oxford University Press journal article supplement (doi:10.1534/g3.116.036848), 2016-12-01
Supplement: 3765_tagc-meeting-report-supp1.pdf [file 3765_tagc-meeting-report-supp1.pdf]

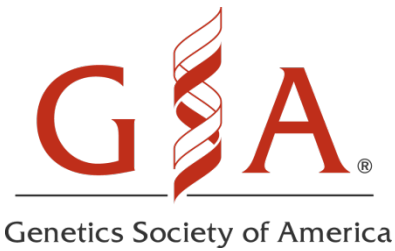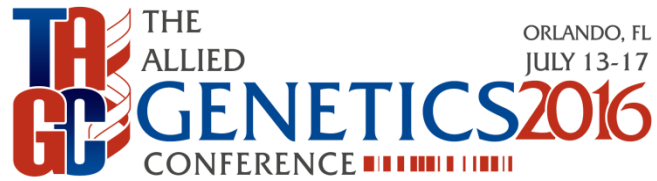

## Conference Organizers

[www.genetics2016.org](http://www.genetics2016.org)

### TAGC Coordinating Committee.

- **Co-Chairs**
  - **Phil Hieter** (*University of British Columbia*)
  - **Jeannie T. Lee** (*HHMI, Harvard Medical School, and Massachusetts General Hospital*)
- **Community Representatives**
  - *C. elegans*: **Paul W. Sternberg** (*HHMI and California Institute of Technology*)
  - Ciliates: **Geoffrey Kapler** (*Texas A&M University*)
  - *Drosophila*: **Susan Celniker** (*Lawrence Berkeley National Laboratory*)
  - Mouse: **John C. Schimenti** (*Cornell University*)
  - Pop/Evol/Quant Genetics: **Michael Lynch** (*Indiana University*)
  - Yeast: **Michael Snyder** (*Stanford University*)
  - Zebrafish: **Rebecca D. Burdine** (*Princeton University*)
  - Trainee Representative: **Kathleen Dumas** (*Buck Institute for Research on Aging*)

## Community Organizers

Each community has its own organizing committee with primary responsibility for the scientific program within each constituent meeting:

### [C. elegans](#)

- **Monica Gotta** (*University of Geneva, Switzerland*)
- **Kevin O’Connell** (*National Institute of Diabetes and Digestive and Kidney Diseases, NIH*)

### [Ciliates](#)

- **Mark Winey** (*University of Colorado–Boulder*), Chair
- **Geoffrey Kapler** (*Texas A&M University*)
- **Joshua Smith** (*Missouri State University*)
- **Judith Van Houten** (*University of Vermont*)

### [Drosophila](#)

- **Susan Celniker** (*Lawrence Berkeley National Laboratory*), Chair
- **David Bilder** (*University of California, Berkeley*)
- **Nancy Bonini** (*HHMI and University of Pennsylvania*)
- **Ross Cagan** (*Mount Sinai School of Medicine*)

### [Mouse](#)

- **Teresa Gunn** (*McLaughlin Research Institute for Biomedical Sciences*), Co-Chair
- **Monica Justine** (*University of Toronto and The Hospital for Sick Children, Canada*), Co-Chair
- **David Beier** (*Seattle Children’s Research Institute*)
- **Martin Hrabé de Angelis** (*Helmholz Center and Technical University, Munich, Germany*)
- **Yumiko Saga** (*National Institute of Genetics, Japan*)
- **Philippe Soriano** (*Mount Sinai School of Medicine*)
- **François Spitz** (*European Molecular Biology Laboratory, Germany*)

### [Population, Evolutionary, and Quantitative Genetics](#)

- **Michael Lynch** (*Indiana University*), Chair
- **Kirsten Bomblies** (*Harvard University*)
- **Lauren McIntyre** (*University of Florida*)
- **Bret Payseur** (*University of Wisconsin–Madison*)
- **Dmitri Petrov** (*Stanford University*)

### Yeast

- **Michael Snyder** (*Stanford University*), Chair
- **Brenda Andrews** (*University of Toronto, Canada*)
- **Yoshikazu Ohya** (*University of Tokyo, Japan*)
- **Lars Steinmetz** (*Stanford University and European Molecular Biology Laboratory, Germany*)
- **Peter Sterling** (*BC Cancer Agency, Canada*)

### Zebrafish

- **Rebecca Burdine** (*Princeton University*)
- **Richard Dorsky** (*University of Utah*)
- **Joan Heath** (*Walter and Eliza Hall Institute of Medical Research, Australia*)
- **Anming Meng** (*Tsinghua University, China*)
- **Teresa Nicholson** (*Oregon Health and Science University*)
- **Elizabeth Patton** (*Medical Research Council, Institute of Genetics and Molecular Medicine, UK*)
